# Supplementary material for: Enhancing the energy storage capacity of graphene supercapacitors via solar heating
Source: Royal Society of Chemistry journal article supplement (doi:10.1039/d1ta09222g), 2021-12-21
Supplement: d1ta09222g1.pdf [file d1ta09222g1.pdf]

Electronic Supplementary Information

**Enhancing Energy Storage Capacity of Graphene  
Supercapacitors via Solar Heating**

Xinling Yu,<sup>‡ac</sup> Nian Li,<sup>‡ac</sup> Shudong Zhang,<sup>ac</sup> Cui Liu,<sup>ac</sup> Liqing Chen,<sup>abc</sup> Min Xi,<sup>ac</sup> Yanping Song,<sup>abc</sup>

Sarmad Ali,<sup>ac</sup> Obaid Iqbal,<sup>ac</sup> Mingyong Han<sup>d</sup>, Changlong Jiang<sup>ac</sup> and Zhenyang Wang<sup>\*ac</sup>

<sup>a</sup>Institute of Solid-State Physics, Chinese Academy of Sciences, Hefei, Anhui 230031, China

<sup>b</sup>Department of Chemistry, University of Science and Technology of China, Hefei, Anhui 230026,

China

<sup>c</sup>Key Laboratory of Photovoltaic and Energy Conservation Materials, Hefei Institutes of Physical Science, Chinese Academy of Sciences, Hefei 230031, China

<sup>d</sup>Institute of Molecular Plus, Tianjin University, Tianjin 300072, China

<sup>‡</sup>These authors contributed equally to this work.

\* Corresponding author.

zywang@iim.ac.cn (Zhenyang Wang)

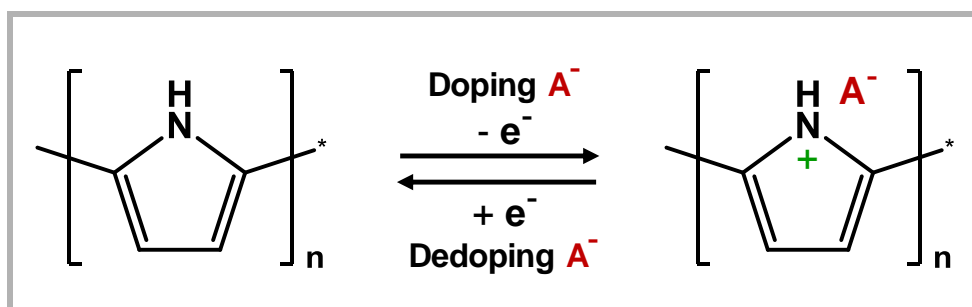

**Note S1** Faradaic reaction of the PPy in the ST-MSC

The conducting polymers polypyrrole (PPy) provides the pseudocapacitance from a Faradaic process on its surface through the doping/dedoping reaction,  $\text{A}^-$  represents the negative ions such as  $\text{PTS}^-$ ,  $\text{SO}_4^{2-}$ , and so on.

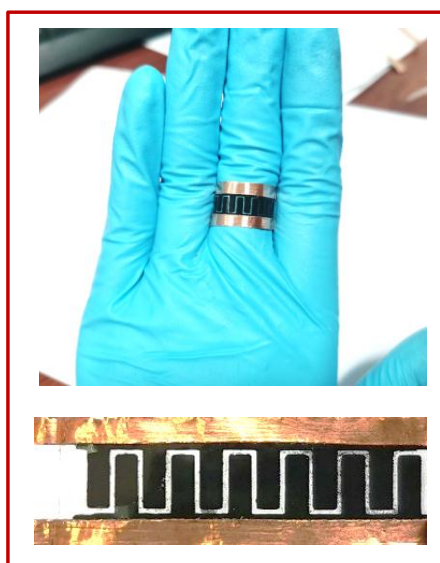

**Fig. S1** Photograph of the flexible ST-MSC worn on the finger.

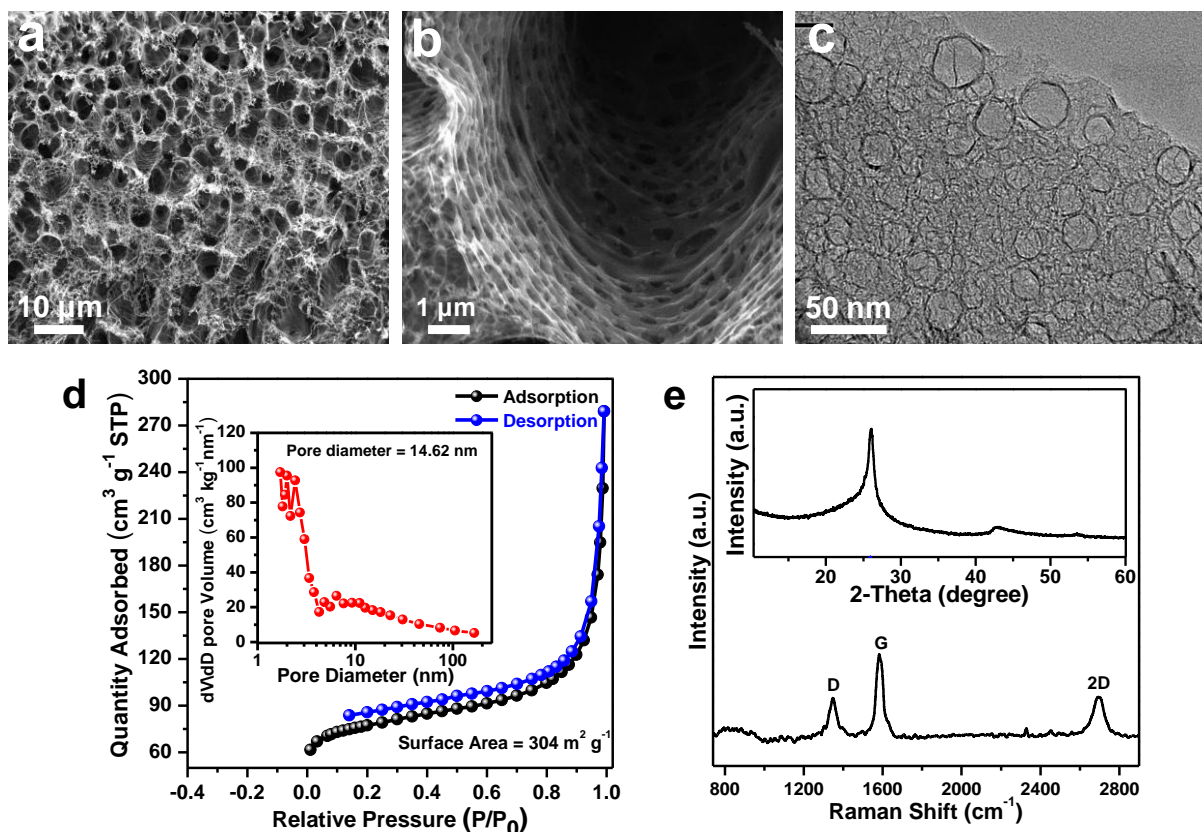

**Fig. S2** Morphology characterizations of the LIG. The SEM images (a, b) and TEM image (c). (d)  $N_2$  adsorption/desorption isotherm and pore size distribution. (e) XRD and Raman spectroscopy.

The LIG can be characterized by the characteristic peaks at  $1349\text{ cm}^{-1}$  (D band, disorder and defective nature of graphene),  $1583\text{ cm}^{-1}$  (G band, graphitic  $sp^2$  carbon) and  $2706\text{ cm}^{-1}$  (2D band, alteration of the electronic band structure resulted from the interactions between the graphene layers). The low  $I_D/I_G$  of the LIG indicates the graphitic structure<sup>[1-3]</sup>. XRD analysis confirms the graphitization of LIG by two distinct peaks at  $26^\circ$  and  $43.2^\circ$ , corresponding to the typical (002) and (100) lattice planes of crystallized graphite, respectively<sup>[4-6]</sup>.

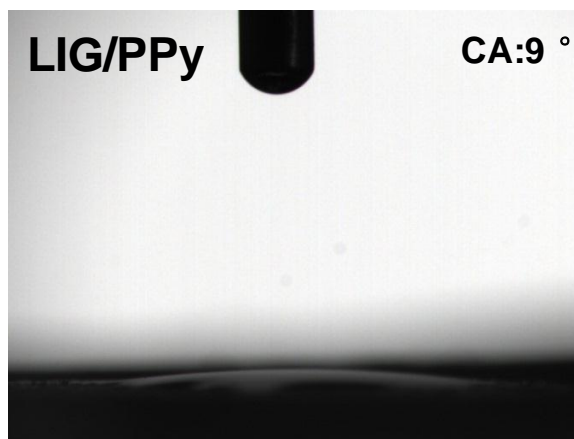

**Fig. S3** Contact angle of water on LIG/PPy-15000.

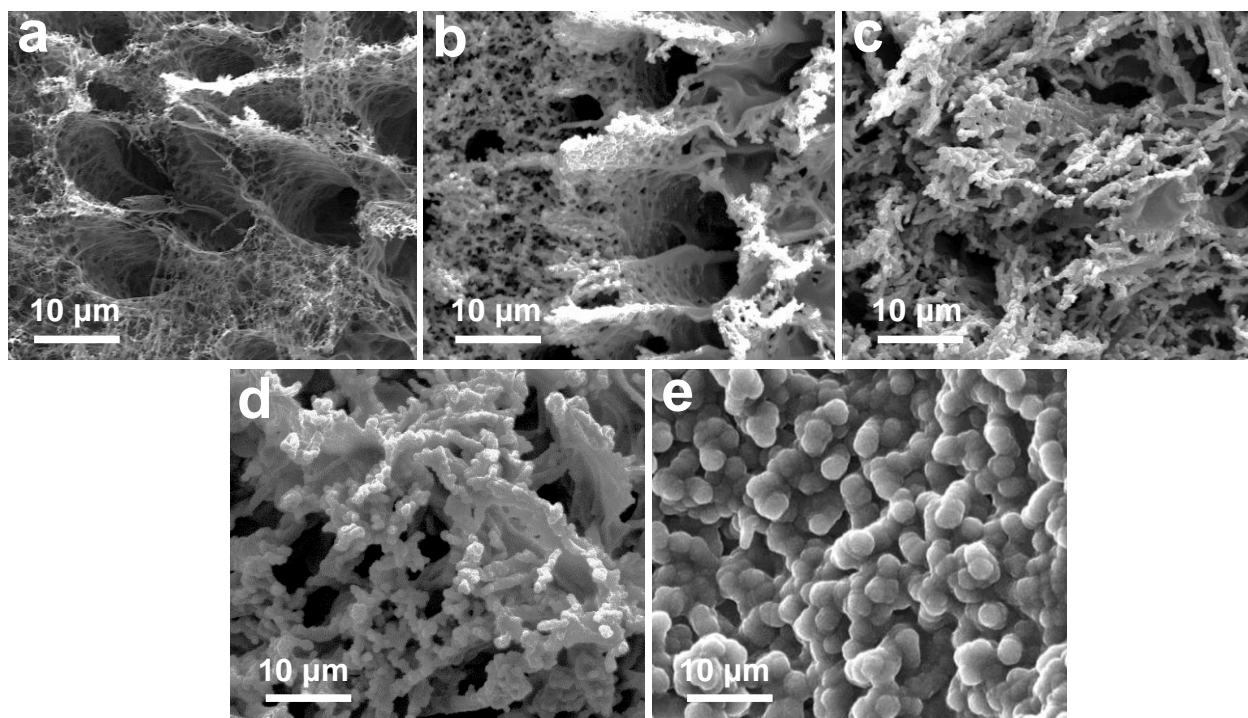

**Fig. S4** Top view of SEM images of (a) LIG, (b) LIG/PPy-5000, (c) LIG/PPy-10000, (d) LIG/PPy-15000, and (e) LIG/PPy-20000.

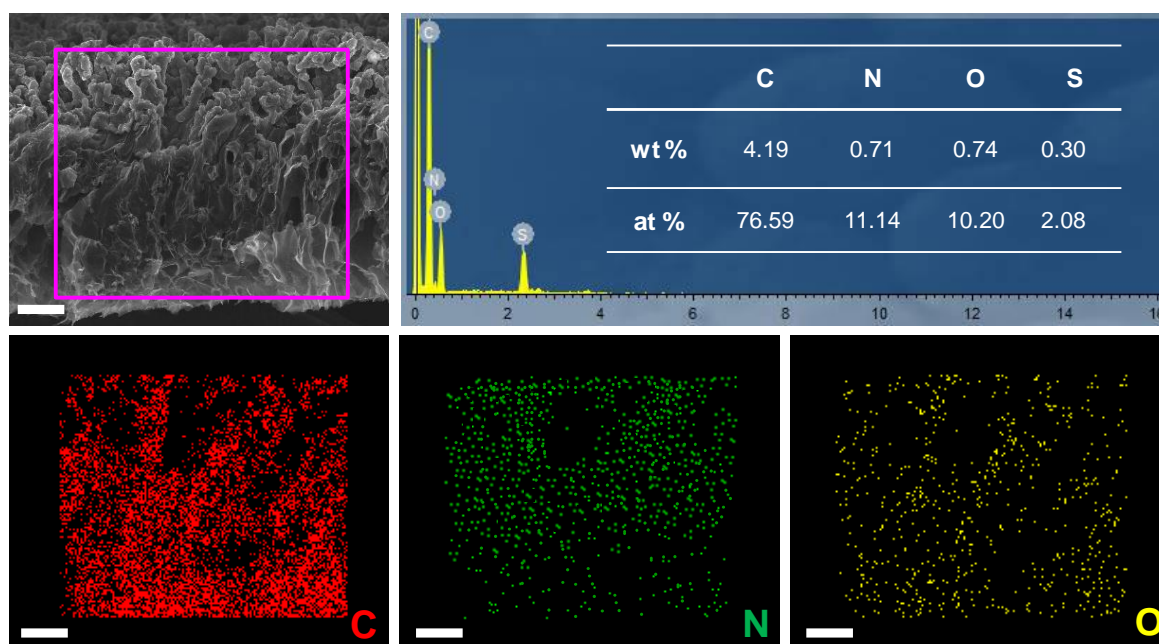

**Fig. S5** The cross-sectional SEM image and the corresponding EDS elemental mappings of LIG/PPy-15000 composite, the scale bars are 50  $\mu\text{m}$ .

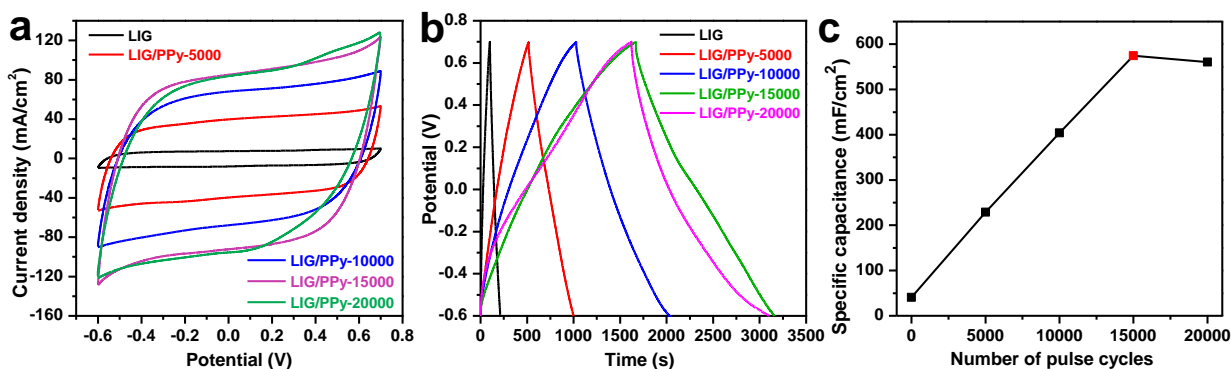

**Fig. S6** (a) CV curves of ST-MSC based on LIG/PPy-X electrode, the scan rate is 200 mV s<sup>-1</sup>. (b) GCD curves of LIG and LIG/PPy-X, the current density is 0.5 mA cm<sup>-2</sup>. (c) The areal specific capacitances of LIG and LIG/PPy-X calculated from the GCD curves at the current density is 0.5 mA cm<sup>-2</sup>.

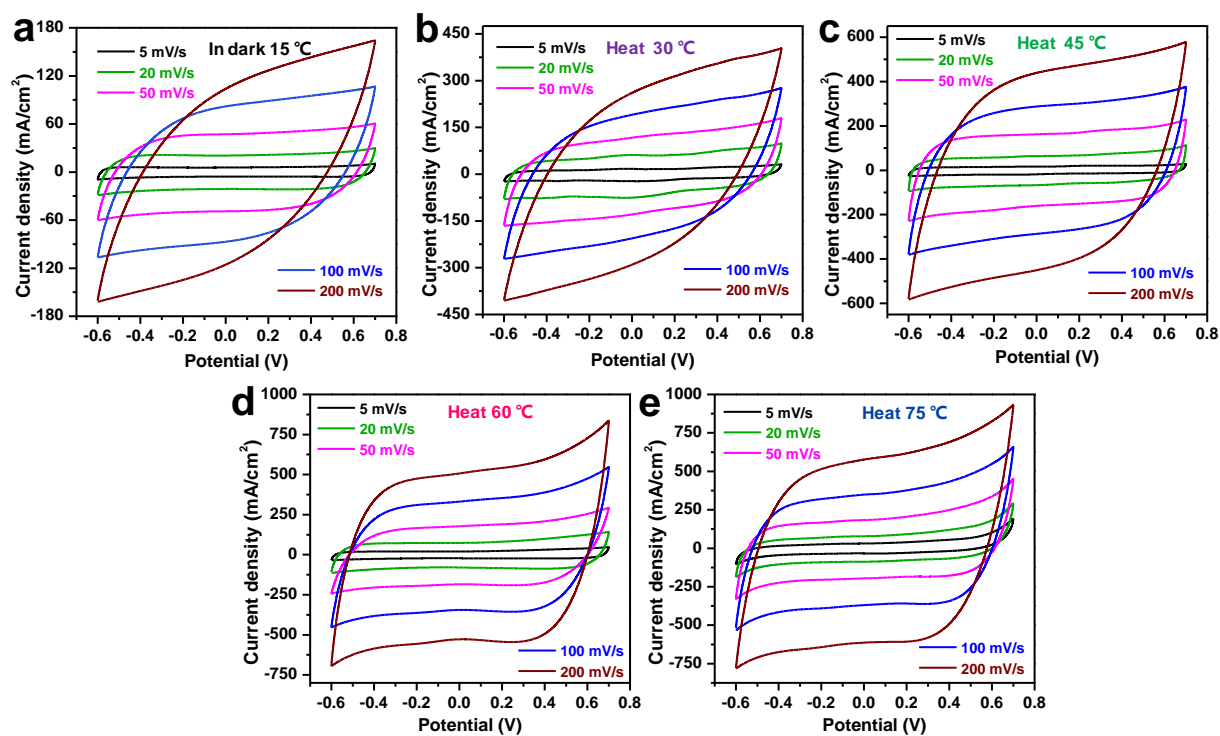

**Fig. S7** (a) CV curves of ST-MSC in dark (15 °C). CV curves of ST-MSC at the heating temperature of (b) 30 °C, (c) 45 °C, (d) 60 °C, and (e) 75 °C at the scan rate range of 5 and 200 mV/s.

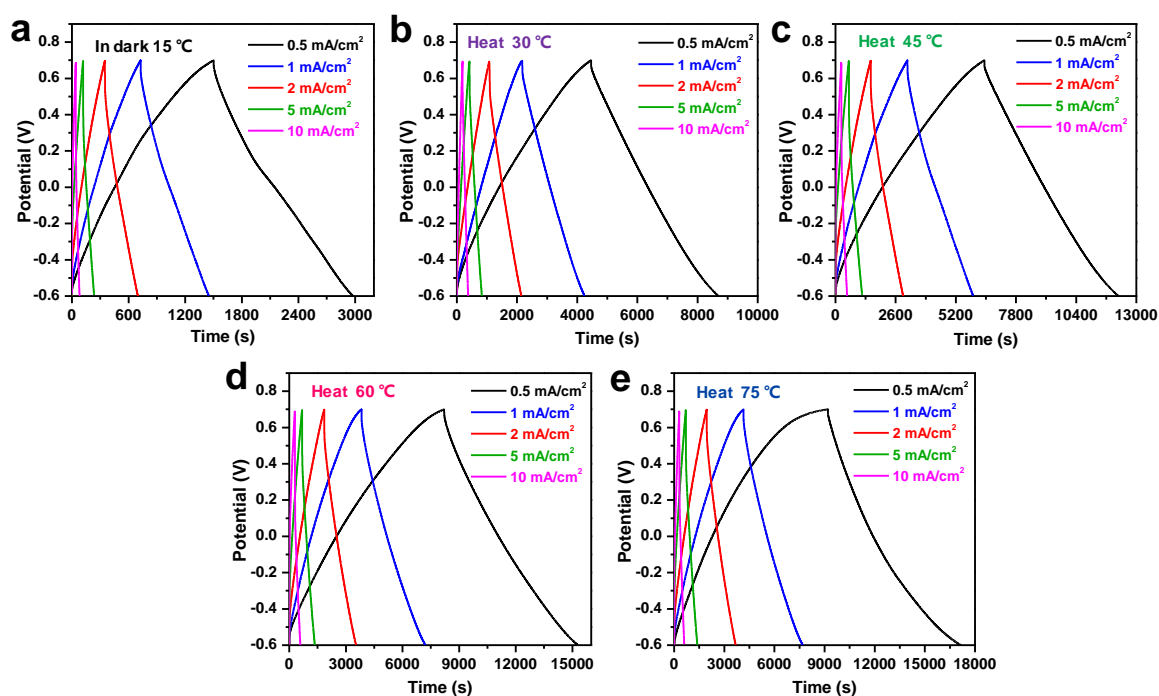

**Fig. S8** (a) GCD curves of ST-MSC in dark 15 °C. GCD curves of ST-MSC at the heating temperature of (b) 30 °C, (c) 45 °C, (d) 60 °C, and (e) 75 °C at the current density range of 0.5 and 10 mA/cm<sup>2</sup>.

**Table S1** Comparison of capacitance, energy density, power density, and stability of reported MSC based on graphene composite electrodes

| Electrode            | Specific capacitance<br>(mF/cm <sup>2</sup> )/(F/cm <sup>3</sup> )                                                         | Energy density<br>(μWh/cm <sup>2</sup> )/(mWh/cm <sup>3</sup> )                                  | Power density<br>(μW/cm <sup>2</sup> )/(mW/cm <sup>3</sup> ) | Capacitance retention                                                                                 | Ref.      |
|----------------------|----------------------------------------------------------------------------------------------------------------------------|--------------------------------------------------------------------------------------------------|--------------------------------------------------------------|-------------------------------------------------------------------------------------------------------|-----------|
| LIG/PANI             | 90.3/11.88 at 0.5 mA/cm <sup>2</sup>                                                                                       | 8.0/1.05                                                                                         | 629.5/82.83                                                  | 97 % after 6000 cycles                                                                                | [7]       |
| LIG/MnO <sub>2</sub> | 233.4/23.35 at 0.5 mA/cm <sup>2</sup>                                                                                      | 32.4/3.21                                                                                        | 2334.0/231.1                                                 | 82 % after 6000 cycles                                                                                | [7]       |
| PPy/GF               | 89.6/~0.48 at 0.6 mA/cm <sup>2</sup>                                                                                       | 24/~0.13                                                                                         | 390/~2.09                                                    | ~75 % after 10000 cycles                                                                              | [8]       |
| rGO/PPy              | 9.4/-- at 0.17 mA/cm <sup>2</sup>                                                                                          | 20/--                                                                                            | 40/--                                                        | 87 % after 2000 cycles                                                                                | [9]       |
| rGO/PPy              | 512/59.9 at 1.0 mA/cm <sup>2</sup>                                                                                         | 61.4/7.18                                                                                        | 10/1.17                                                      | 82.7 % after 10000 cycles                                                                             | [10]      |
| LIG/PPy              | 574/19.1 (R.T., 15 °C)<br>2755.2/91.84 (60 °C)<br>2752.3/91.74 (R.T., under 1 solar irradiation) at 0.5 mA/cm <sup>2</sup> | 134.7/4.49 (R.T., 15 °C)<br>646.6/21.56 (60 °C)<br>646.0/21.53 (R.T., under 1 solar irradiation) | 6500/216.7                                                   | 96.3 % (R.T., 15 °C)<br>86.0 % (60 °C)<br>85.8 % (R.T., under 1 solar irradiation) after 10000 cycles | This work |



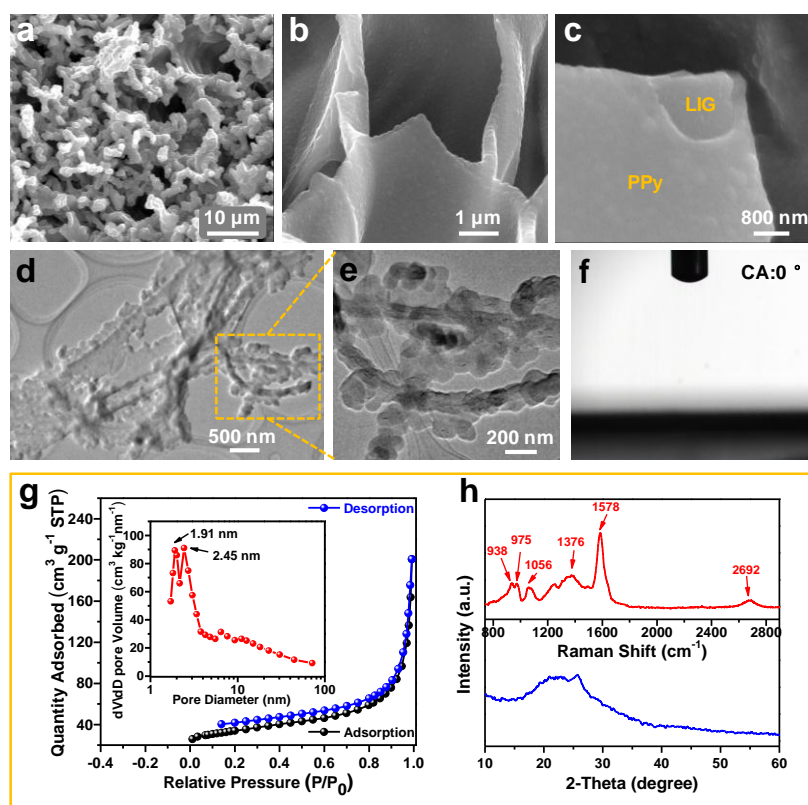

**Fig. S9** The structural and morphological characterizations of the LIG/PPy-15000 after 10000 GCD cycles at 60 °C. (a-c) The SEM images of LIG/PPy-15000 at different magnifications. (d and e) The TEM images of LIG/PPy-15000 at different magnifications. (f) Contact angle of water on LIG/PPy-15000. (g) N<sub>2</sub> adsorption/desorption isotherm and pore size distribution of LIG/PPy-15000. (h) XRD and Raman patterns of LIG/PPy-15000.

No obvious changes were observed in the structures and morphologies of electrode material before and after the electrochemical studies at 60 °C, indicating the good stability of the electrode material to temperature.

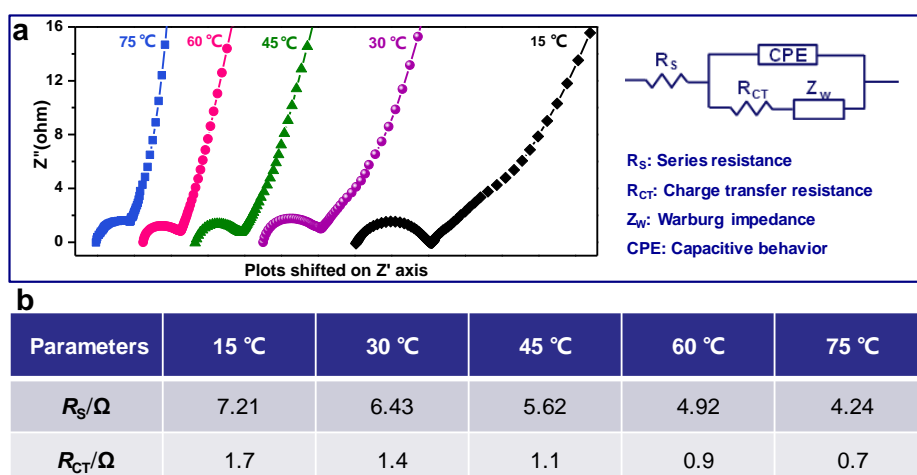

**Fig. S10** (a) Nyquist spectra of panel a showing the semicircles plotted on the shifted real axis for clarity (left); The equivalent circuit model (right). (b) Parameter results simulated by the equivalent circuit model.

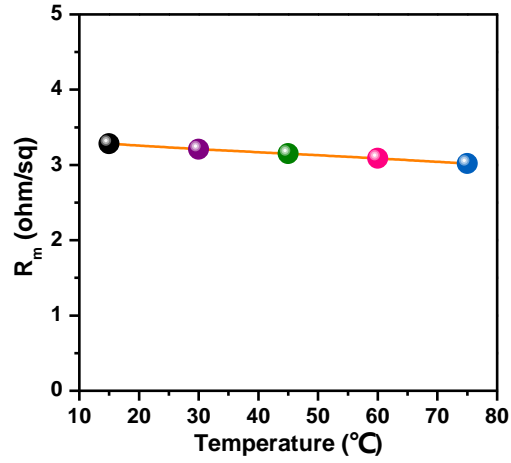

**Fig. S11** The change of the  $R_m$  value when the temperature rises from 15 to 75 °C.

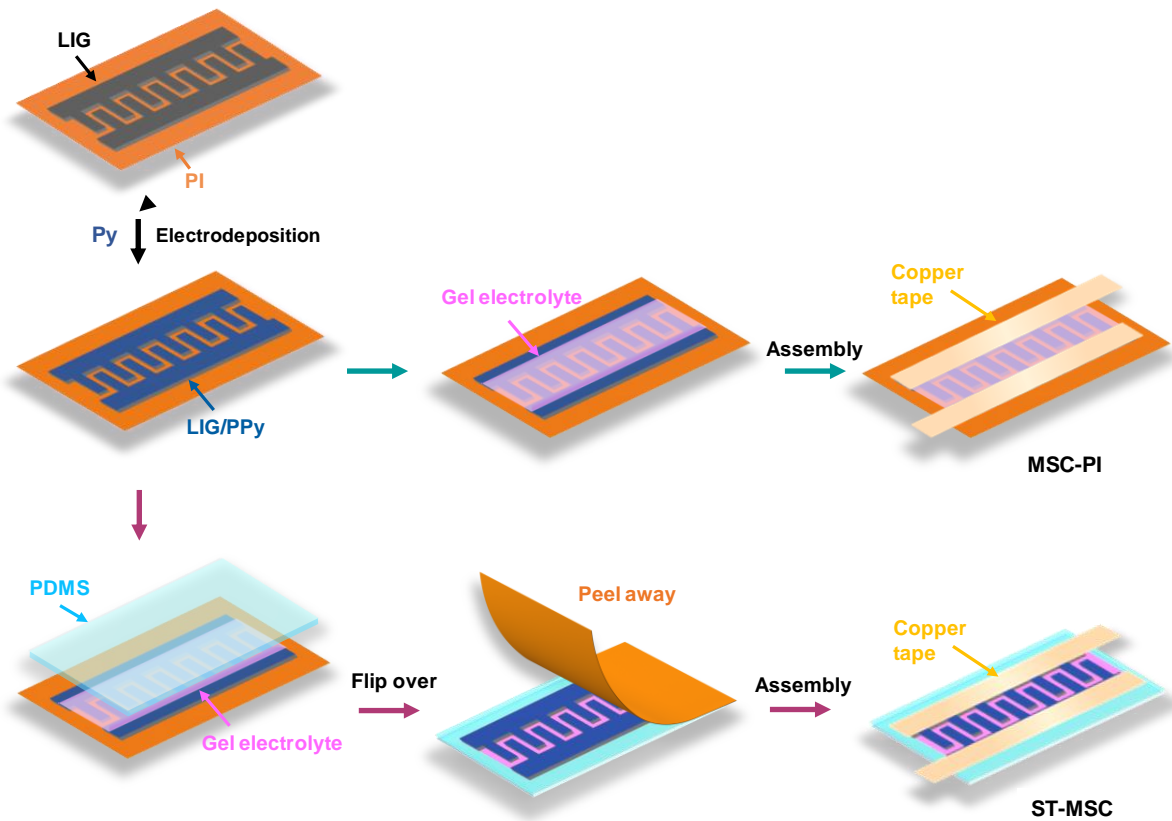

**Fig. S12** Fabrication of two different structures MSCs: MSC-PI and ST-MSC.



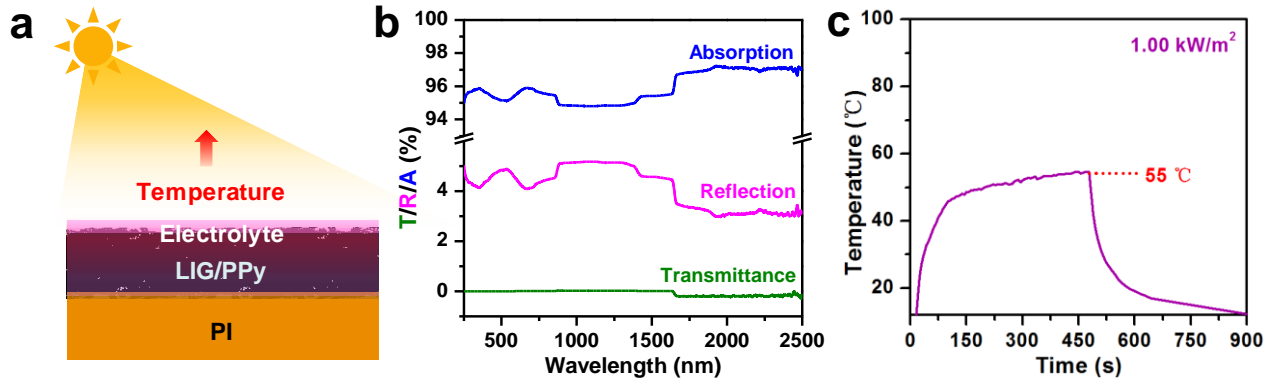

**Fig. S13** (a) Schematic cross-section of the MSC-PI. (b) UV-vis-NIR transmittance (T), reflectance (R), and absorption (A) spectra of the MSC-PI. (c) Time-courses of the MSC-PI under solar irradiation at a light intensity of  $1.00 \text{ kW m}^{-2}$ .

The solar-thermal conversion efficiency ( $\eta$ ) is calculated according to the following equation:

$$\eta = [h S_{MSC} (T_{\max} - T_0) - Q_s] / I(1 - 10^{-A}) \quad (\text{S1})$$

$$\tau = \sum M_e C_e / h S_{MSC} \quad (\text{S2})$$

where  $h$  is the heat-transfer coefficient,  $S_{MSC}$  is the area of the MSC,  $T_{\max}$  is the maximum temperature in steady state,  $T_0$  is ambient temperature,  $Q_s$  is the thermal energy dissipated to the surrounding per unit time,  $I$  is the simulated solar light intensity,  $A$  is the absorbance of the MSC over the entire solar spectrum,  $\tau$  is the system time constant,  $M_e$  and  $C_e$  are the mass and heat capacity of electrode material and electrolyte, respectively. The detailed calculation parameters of  $\eta$  are listed in Table S1.

**Table S2** The detailed calculation parameters of  $\eta$  of MSCs.

| Parameter | $T_0$          | $I$                   | $C_{\text{LIG}}$ | $C_{\text{PPy}}$ | $C_{\text{GE}}$ |
|-----------|----------------|-----------------------|------------------|------------------|-----------------|
| MSCs      | 288.15 K       | $1.00 \text{ kW/m}^2$ | 1.34 J/kg/K      | 1.34 J/kg/K      | 5 J/kg/K        |
| Parameter | $T_{\max}$ (K) | $A$                   | $M_{\text{LIG}}$ | $M_{\text{PPy}}$ | $M_{\text{GE}}$ |
| ST-MSC    | 348.2          | 98.8 %                | 1.2 mg           | 5.1 mg           | 300 mg          |
| MSC-PI    | 338.5          | 95.9 %                | 1.2 mg           | 5.1 mg           | 300 mg          |

$M_{\text{LIG}}$ ,  $M_{\text{PPy}}$ , and  $M_{\text{GE}}$  are the mass of LIG, PPy, and Gel Electrolyte of the MSC-PI and ST-MSC, respectively;

$C_{\text{LIG}}$ ,  $C_{\text{PPy}}$ , and  $C_{\text{GE}}$  are the heat capacity of LIG, PPy, and Gel Electrolyte of the MSC-PI and ST-MSC, respectively.

**Table S3** The comparison of transmittance (T), reflectance (R), absorption (A), solar-thermal conversion efficiency ( $\eta$ ), and the surface temperature change ( $\Delta T$ , under the solar irradiation at a light intensity of  $1.00 \text{ kW m}^{-2}$ ) of the MSC-PI and ST-MSC.

|               | Transmittance (T) | Reflectance (R) | Absorption (A) | Solar-thermal conversion efficiency ( $\eta$ ) | Temperature change ( $\Delta T$ ) |
|---------------|-------------------|-----------------|----------------|------------------------------------------------|-----------------------------------|
| <b>ST-MSC</b> | 0.1 %             | 0.1 %           | 98.9 %         | 23.5 %                                         | 45 °C                             |
| <b>MSC-PI</b> | 0.1 %             | 4.3 %           | 95.6 %         | 22.8 %                                         | 40 °C                             |

## Electrochemical measurements

All electrochemical tests including cyclic voltammetry (CV), galvanostatic charge discharge (GCD), and electrochemical impedance spectroscopy (EIS) were performed on a CHI 660E electrochemical workstation (Shanghai CH Instrument Company, China). The areal specific capacitance ( $C_{MSC, A}$ ) and volumetric specific capacitance ( $C_{MSC, v}$ ) of the MSC were calculated from GCD curves according to equations S3 and S4, respectively:

$$C_{MSC, A} = I / (A_{MSC} \times (dV/dt)) \quad (S3)$$

$$C_{MSC, v} = I / (V_{MSC} \times (dV/dt)) \quad (S4)$$

where,  $I$  (mA) was the discharge current;  $dV/dt$  was the slope of galvanostatic discharge curves;  $A_{MSC}$  ( $\text{cm}^2$ ) and  $V_{MSC}$  ( $\text{cm}^3$ ) were the area and volume of the MSC, respectively.

The areal energy density ( $E_{MSC, A}$ ) and volumetric energy density ( $E_{MSC, v}$ ) of the MSC device were calculated by using equations S5 and S6, respectively:

$$E_{MSC, A} = C_{MSC, A} V^2 / (2 \times 3600) \quad (S5)$$

$$E_{MSC, v} = C_{MSC, v} V^2 / (2 \times 3600) \quad (S6)$$

where  $V$  was the potential difference of the full discharge process.

The areal power densities ( $P_{MSC, A}$ ) and volumetric energy density ( $P_{MSC, v}$ ) of the MSC device were calculated by using equations S7 and S8, respectively:

$$P_{MSC, A} = 3600 E_{MSC, A} / t \quad (S7)$$

$$P_{MSC, v} = 3600 E_{MSC, v} / t \quad (S8)$$

where  $t$  is the time spent in full discharge.

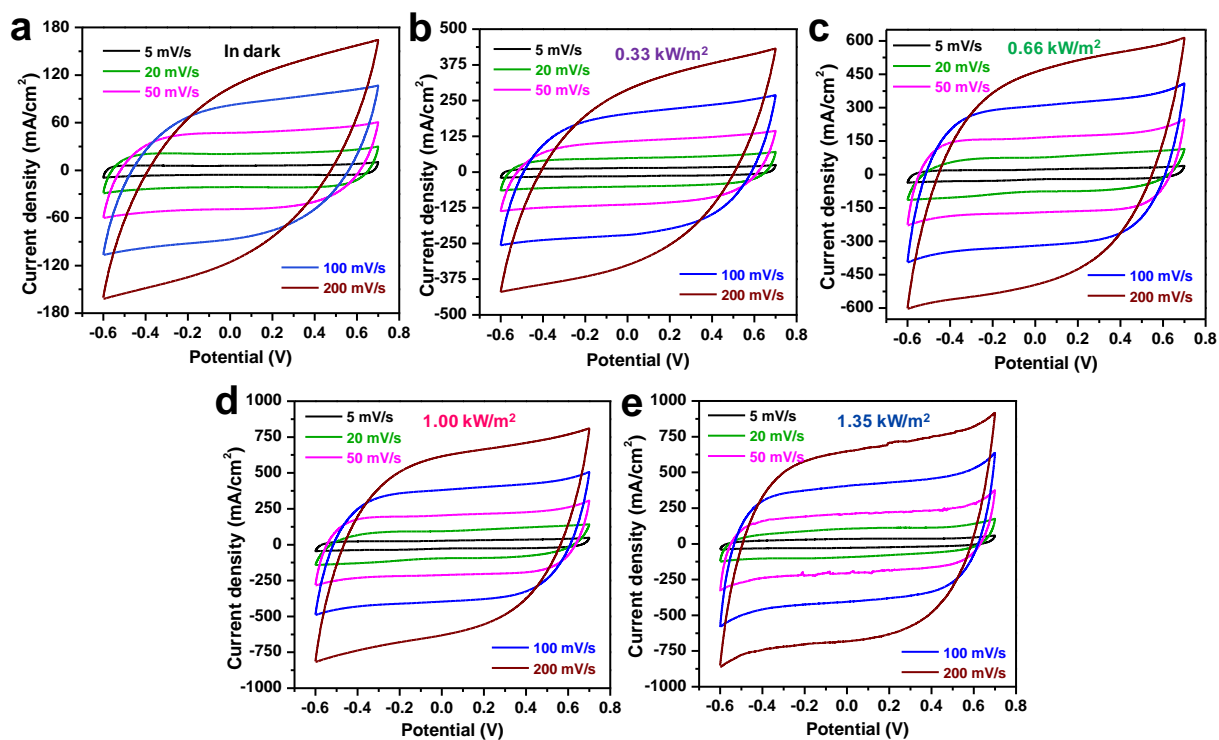

**Fig. S14** (a) CV curves of ST-MSC in dark. CV curves of MSC under (b)  $0.33 \text{ kW/m}^2$ , (c)  $0.66 \text{ kW/m}^2$ , (d)  $1.00 \text{ kW/m}^2$ , and (e)  $1.35 \text{ kW/m}^2$  at the scan rate range of 5 and 200 mV/s.

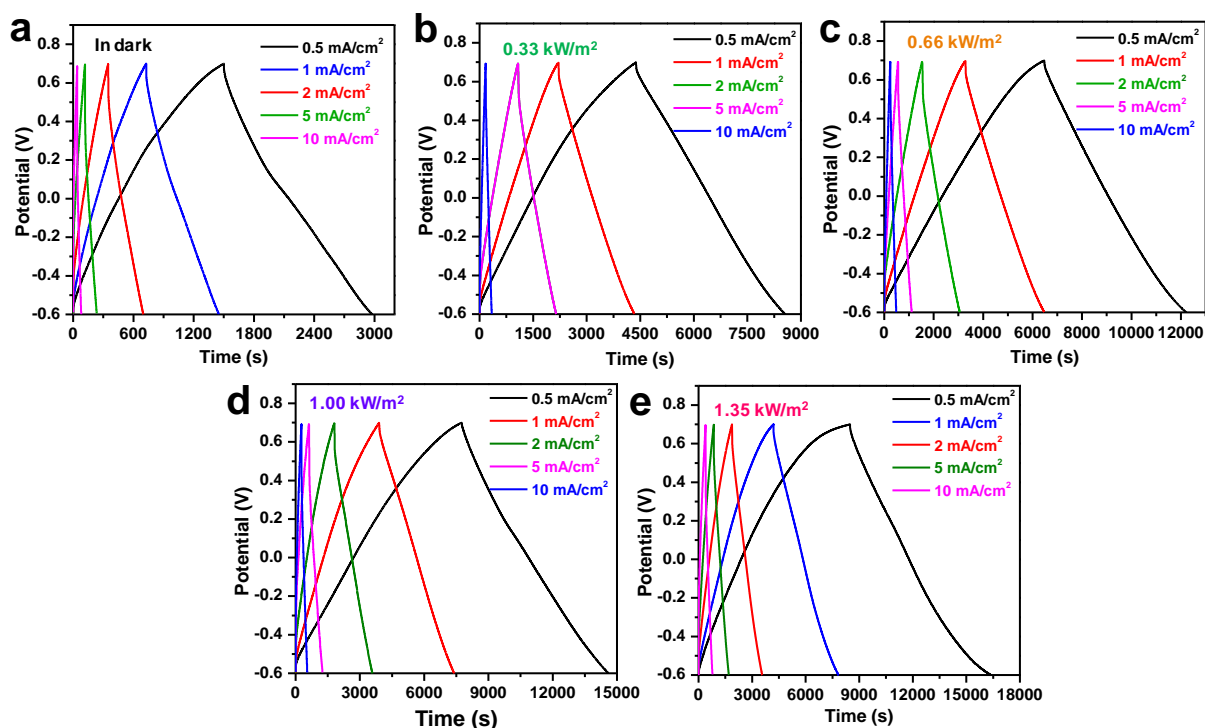

**Fig. S15** (a) GCD curves of ST-MSC in dark. GCD curves of MSC under (b)  $0.33 \text{ kW/m}^2$ , (c)  $0.66 \text{ kW/m}^2$ , (d)  $1.00 \text{ kW/m}^2$ , and (e)  $1.35 \text{ kW/m}^2$  at the current density range of 0.5 and 10 mA/cm<sup>2</sup>.

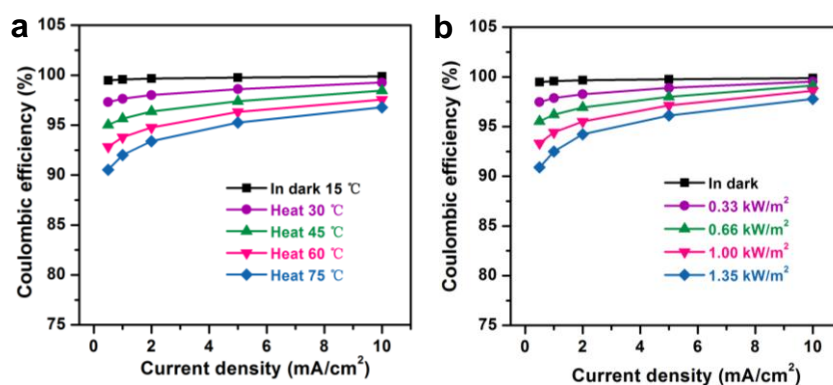

**Fig. S16** The coulombic efficiencies of the ST-MSC at different heating temperatures and under different solar light intensities.

**Table S4** Comparison of capacitance, energy density, and experiment conditions for the reported solar-heated supercapacitors

| Electrode materials  | Electrolyte                        | Heating method                                      | Potential window (V) | Specific capacitance (F/cm <sup>3</sup> )                                                                                                                   | Energy density (mWh/cm <sup>3</sup> )                                                                                            | Stability (capacitance retention)                                                                                                                          | Ref.      |
|----------------------|------------------------------------|-----------------------------------------------------|----------------------|-------------------------------------------------------------------------------------------------------------------------------------------------------------|----------------------------------------------------------------------------------------------------------------------------------|------------------------------------------------------------------------------------------------------------------------------------------------------------|-----------|
| N-MCN @GH            | PVA/H <sub>2</sub> SO <sub>4</sub> | Solar heating in-situ from electrode material       | 0-1.0                | 8.1 (R.T., 17 °C)/4.05 (cooling to 5 °C)/15.39 (cooling and under 3.6 solar irradiation) at 0.64 mA/cm <sup>2</sup>                                         | 1.12 (R.T., 17 °C)/0.56 (cooling to 5 °C)/2.13 (cooling and under 3.6 solar irradiation)                                         | 80 % (R.T., 17 °C) after 10000 cycles                                                                                                                      | [11]      |
| Graphene /PEDOT: PSS | PVA/H <sub>3</sub> PO <sub>4</sub> | Solar heating in-situ from electrode material       | 0-0.7                | 0.53 (R.T., 25 °C)/0.82 (under 1 solar irradiation) at 3.3 mA/cm <sup>3</sup>                                                                               | 0.036 (R.T., 25 °C) / 0.056 (under 1 solar irradiation)                                                                          | 99.76 % after 16000 cycles (R.T., 25 °C)/72.04 % (under 1 solar irradiation) after 2000 cycles                                                             | [12]      |
| PPy                  | PVA/H <sub>2</sub> SO <sub>4</sub> | Solar heating ex-situ from additional graphene film | 0-0.6                | 12.08 (cooling to -50 °C)/24.5 (cooling and under 1 solar irradiation) at 100 mV s <sup>-1</sup>                                                            | 0.96 (cooling to -50 °C)/1.404 (cooling and under 1 solar irradiation)                                                           | 91.57% (cooling to -50 °C)/98.41% (cooling and under 1 solar irradiation) after 5000 cycles                                                                | [13]      |
| LIG/PPy              | PVA/H <sub>2</sub> SO <sub>4</sub> | Solar heating in-situ from electrode material       | -0.6-0.7             | 19.1 (R.T., 15 °C)/91.74 (R.T., under 1 solar irradiation)/4.25 (cooling to -30 °C)/17.34 (cooling and under 1 solar irradiation) at 0.5 mA/cm <sup>2</sup> | 4.49 (R.T., 15 °C)/ 21.53 (R.T., under 1 solar irradiation)/1.0 (cooling to -30 °C)/4.08 (cooling and under 1 solar irradiation) | 96.3 % (R.T., 15 °C)/85.8 % (R.T., under 1 solar irradiation)/82.4 % (cooling to -30 °C)/95.2 % (cooling and under 1 solar irradiation) after 10000 cycles | This work |

**Note:** N-MCN@GH: N-doped mesoporous carbon nanosphere-intercalated 3D graphene hydrogel

PEDOT:PSS: Poly(3,4-ethylenedioxythiophene):Poly(sodium-p-styrenesulfonate)

1 solar irradiation intensity is 1.0 kW/m<sup>2</sup>

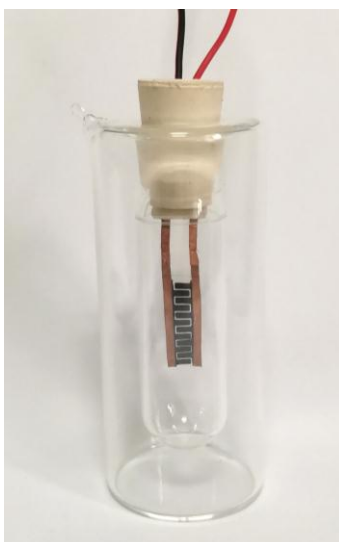

**Fig. S17** Optical image of the low-temperature testing equipment (the ST-MSC placed and sealed in a homemade double-layer quartz container).

## Reference:

- 1 R. Q. Ye, D. K. James and J. M. Tour, *Adv. Mater.*, 2019, **31**, 1803621.
- 2 G. Chen, Y. Liu, F. Liu and X. Zhang, *Appl. Surf. Sci.*, 2014, **311**, 808
- 3 Z. Chen, W. Ren, L. Gao, B. Liu, S. Pei and H. M. Cheng, *Nat. Mater.*, 2011, **10**, 424.
- 4 C. Zhu, T. Y. J. Han, E. B. Duoss, A. M. Golobic, J. D. Kuntz, C. M. Spadaccini and M. A. Worsley, *Nat. Commun.*, 2015, **6**, 6962.
- 5 A. C. Ferrari, J. C. Meyer, V. Scardaci, C. Casiraghi, M. Lazzeri, F. Mauri, S. Piscanec, D. Jiang, K. S. Novoselov, S. Roth and A. K. Geim, *Phys. Rev. Lett.*, 2006, **97**, 187401.
- 6 A. M. Dimiev, G. Ceriotti, N. Behabtu, D. Zakhidov, M. Pasquali, R. Saito and J. M. Tour, *ACS Nano*, 2013, **7**, 2773.
- 7 L. Li, J. B. Zhang, Z. W. Peng, Y. L. Li, C. T. Gao, Y. S. Ji, R. Q. Ye, N. D. Kim, Q. F. Zhong, Y. Yang, H. L. Fei, G. D. Ruan, and J. M. Tour, *Adv. Mater.*, 2016, **28**, 838-845.
- 8 H. Park, J. W. Kim, S. Y. Hong, G. Lee, D. S. Kim, J. h. Oh, S. W. Jin, Y. R. Jeong, S. Y. Oh, J. Y. Yun and J. S. Ha, *Adv. Funct. Mater.*, 2018, **28**, 1707013.
- 9 J. C. Chen, Y. M. Wang, J. Y. Cao, Y. Liu, Y. Zhou, J. H. Ouyang and D. C. Jia, *ACS Appl. Mater.*

- Inter.*, 2017, **9**, 19831-19842.
- 10 C. Yang, L. L. Zhang, N. T. Hu, Z. Yang, H. Wei and Y. F. Zhang, *J. Power Sources*, 2016, **302**, 39-45.
- 11 M. Y. Zhao, Y. L. Li, F. Lin, Y. S. Xu, L. L. Chen, W. C. Jiang, T. Jiang, S. G. Yang and Y. Wang, *J. Mater. Chem. A*, 2020, **8**, 1829-1836.
- 12 F. Yi, H. Y. Ren, K. R. Dai, X. F. Wang, Y. Z. Han, K. X. Wang, K. Li, B. L. Guan, J. Wang, M. Tang, J. Y. Shan, H. Yang, M. S. Zheng, Z. You, D. Wei and Z. F. Liu, *Energy Environ. Sci.*, 2018, **11**, 2016.
- 13 Y. L. Sun, P. J. Ma, L. Y. Liu, J. T. Chen, X. Zhang, J. W. Lang and X. B. Yan, *Sol. RRL*, 2018, **2**, 1800223.
